# Supplementary material for: Negative Regulation of Type I IFN Expression by OASL1 Permits Chronic Viral Infection and CD8+ T-Cell Exhaustion
Source: PubMed Central journal article supplement (PMC3715418; doi:10.1371/journal.ppat.1003478), 2013-07-18

**A**

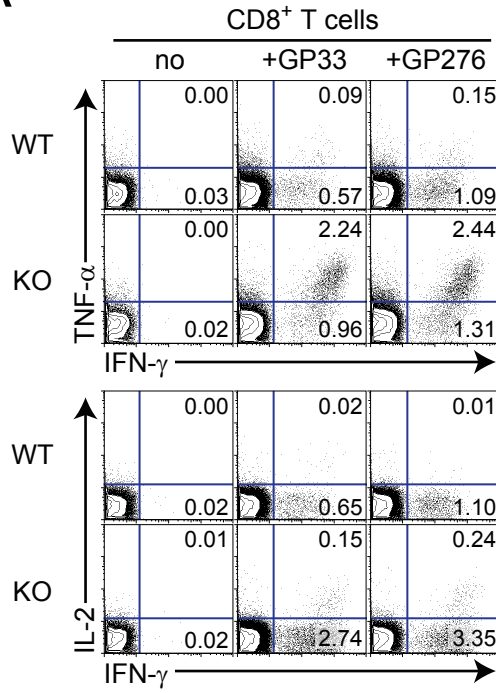

**B**

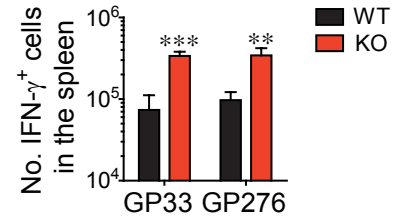

**C**

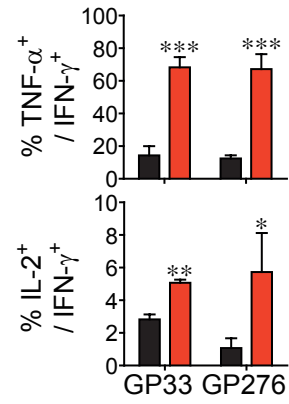

Supplement: ppat.1003478.s005.pdf [file ppat.1003478.s005.pdf]
